# Supplementary material for: Genome-Wide Association Study Reveals a New QTL for Salinity Tolerance in Barley (Hordeum vulgare L.)
Source: Front Plant Sci. 2016 Jun 28;7:946. doi: 10.3389/fpls.2016.00946 (PMC4923249; doi:10.3389/fpls.2016.00946)
Supplement: Supplementary file 6 [file Table_3.XLSX]

## Sheet: Sheet1
Table S3 List of genes winthin 15 cM around bpb-9668 at the end of chromosome on 4H
Gene Name	Chromosome	Phy_cM	Gene description
MLOC_70289.1	4	100.177	Glycosylphosphatidylinositol anchor biosynthesis protein 11
MLOC_70290.3	4	100.177	MLo protein
MLOC_14272.1	4	100.567	DET1- and DDB1-associated protein 1
AK367973	4	100.567	Diacylglycerol kinase-like protein
MLOC_13453.1	4	100.567	Pin2-interacting protein x1, putative
MLOC_4076.1	4	100.567	Protein kinase family protein
MLOC_11400.1	4	100.567	WD-repeat protein, putative
AK357206	4	101.098	S-adenosyl-L-methionine-dependent methyltransferase domain-containing protein
AK373775	4	101.31	Dolichyl-diphosphooligosaccharide-protein glycosyltransferase subunit
MLOC_61137.1	4	101.47	Unknown protein
MLOC_55703.1	4	101.558	Bifunctional inhibitor/lipid-transfer protein/seed storage 2S albumin superfamily protein LENGTH=102
MLOC_13135.1	4	101.558	Callose synthase
MLOC_55702.1	4	101.558	Cytochrome C-type biogenesis protein
AK250747.1	4	101.558	DNA polymerase delta subunit 2
MLOC_78144.1	4	101.558	DNA polymerase delta subunit 2
AK367323	4	101.558	ESTs AU029294(E30104)
AK370202	4	101.558	ESTs AU078251(R0889)
MLOC_68937.1	4	101.558	Exosome complex exonuclease exoribonuclease
MLOC_62333.1	4	101.558	F-box protein
MLOC_20815.2	4	101.558	Glucan synthase-like 3
MLOC_70918.1	4	101.558	Glutathione-regulated potassium-efflux system protein
MLOC_52515.2	4	101.558	Glyceraldehyde-3-phosphate dehydrogenase B
MLOC_36993.2	4	101.558	Hydroxyproline-rich glycoprotein family protein
MLOC_62331.1	4	101.558	Peroxidase
MLOC_62332.1	4	101.558	Peroxidase 54
AK373630	4	101.558	Ring finger protein
AK363664	4	101.558	unknown protein; FUNCTIONS IN: molecular_function unknown; INVOLVED IN: biological_process unknown; LOCATED IN: chloroplast; EXPRESSED IN: 21 plant structures; EXPRESSED DURING: 13 growth stages; Has 35333 Blast hits to 34131 proteins in 2444 species: Arc
AK359923	4	101.771	peptide transporter 3 LENGTH=582
MLOC_10725.1	4	101.771	BZIP family transcription factor, putative, expressed
MLOC_10727.2	4	101.771	SMAD/FHA domain-containing protein
AK364947	4	101.983	Anthranilate phosphoribosyltransferase
MLOC_71024.2	4	101.983	CBS domain-containing protein, putative, expressed
MLOC_21112.1	4	101.983	Cell growth defect factor 2
MLOC_10498.1	4	101.983	glucan synthase-like 12 LENGTH=1955
AK373161	4	101.983	Glyoxylate/hydroxypyruvate reductase, putative
MLOC_67679.3	4	101.983	Unknown protein
MLOC_70598.1	4	101.983	Zinc finger protein 3
MLOC_17825.1	4	102.373	DNAJ heat shock N-terminal domain-containing protein LENGTH=726
AK368132	4	103.283	Protein kinase
MLOC_60797.1	4	103.895	Protein of unknown function, DUF538 LENGTH=179
MLOC_37919.1	4	103.907	unknown protein; BEST Arabidopsis thaliana protein match is: unknown protein . LENGTH=182
MLOC_60135.1	4	103.931	BZIP transcription factor
AK369342	4	103.931	GCN5-related N-acetyltransferase, putative, expressed
AK356026	4	103.931	GDSL esterase/lipase
MLOC_72579.1	4	103.931	Heavy metal transport/detoxification superfamily protein LENGTH=358
MLOC_11974.1	4	103.931	Methyltransferase
MLOC_13076.1	4	103.931	Receptor-like protein kinase
MLOC_57111.1	4	103.931	Unknown protein
AK250812.1	4	103.931	Vacuolar sorting receptor 1, putative
MLOC_57363.1	4	103.931	Vicilin
MLOC_57109.1	4	103.931	Zinc finger protein
MLOC_62434.1	4	103.966	24-sterol C-methyltransferase
AK252978.1	4	103.966	50S ribosomal protein L14
AK359456	4	103.966	Mechanosensitive ion channel
AK362554	4	103.966	Phosphate transporter
AK251272.1	4	103.966	Pre-mRNA-processing factor-like protein
MLOC_13124.4	4	103.966	Protein of unknown function (DUF3527) LENGTH=603
MLOC_75880.1	4	103.966	RNA recognition motif family protein, expressed
AK252954.1	4	103.966	Serine carboxypeptidase, putative
AK370716	4	103.966	Splicing factor u2af large subunit, putative
MLOC_35766.1	4	103.966	Thyroid adenoma associated
MLOC_4875.1	4	103.966	unknown protein; BEST Arabidopsis thaliana protein match is: unknown protein . LENGTH=434
MLOC_13125.1	4	103.966	unknown protein; EXPRESSED IN: 11 plant structures; EXPRESSED DURING: 4 anthesis, F mature embryo stage, petal differentiation and expansion stage, E expanded cotyledon stage, D bilateral stage;
MLOC_22475.2	4	104.453	C2H2-like zinc finger protein LENGTH=173
MLOC_59596.1	4	104.582	2-oxoglutarate (2OG) and Fe(II)-dependent oxygenase superfamily protein LENGTH=341
MLOC_57414.1	4	104.582	50S ribosomal protein L11
AK367800	4	104.582	BEL1-like homeodomain protein
AK364918	4	104.582	Beta-amylase
MLOC_3846.1	4	104.582	C2H2 and C2HC zinc fingers superfamily protein LENGTH=191
AK373760	4	104.582	Cysteine-rich repeat secretory protein
MLOC_69029.1	4	104.582	Heterogeneous nuclear ribonucleoprotein D0, putative
AK369536	4	104.582	Homeobox protein knotted-1, putative
AK367522	4	104.582	Inter-alpha-trypsin inhibitor heavy chain H3
AK370626	4	104.582	Inter-alpha-trypsin inhibitor heavy chain H3
AK368348	4	104.582	MADS-box transcription factor
MLOC_66787.1	4	104.582	PLAC8-like protein
AK366779	4	104.582	Protein kinase, putative, expressed
AK364785	4	104.582	SNARE associated Golgi protein family LENGTH=320
MLOC_18334.2	4	104.582	Sugar transporter, putative
AK370403	4	104.582	WD-repeat cell cycle regulatory protein
MLOC_11235.1	4	104.582	Zinc finger protein, putative
MLOC_74586.1	4	104.758	Plant protein of unknown function (DUF946) LENGTH=567
MLOC_75889.3	4	104.963	Pectin lyase-like superfamily protein LENGTH=476
MLOC_55155.1	4	105.486	Unknown protein
AK367470	4	106.002	Heavy metal transport/detoxification superfamily protein LENGTH=183
AK365681	4	107.365	Hydrolase
MLOC_61612.1	4	107.631	12-oxophytodienoate reductase 2
MLOC_38948.1	4	108.823	Kinase-like protein
AK249039.1	4	109.154	Peroxidase 66
MLOC_70775.3	4	109.154	Unknown protein
MLOC_8706.1	4	109.234	DNA helicase, putative
MLOC_70109.1	4	109.234	Double Clp-N motif-containing P-loop nucleoside triphosphate hydrolases superfamily protein LENGTH=815
MLOC_65132.1	4	109.234	Formyltetrahydrofolate deformylase
MLOC_16631.1	4	109.234	Plant protein of unknown function (DUF828) with plant pleckstrin homology-like region LENGTH=405
MLOC_65128.1	4	109.234	Plant protein of unknown function (DUF828) with plant pleckstrin homology-like region LENGTH=405
MLOC_81568.1	4	109.234	Ulp1 protease family, C-terminal catalytic domain, putative
AK376104	4	110.198	Alpha-1,2-fucosidase
MLOC_71237.1	4	110.198	Aquaporin 1
AK248994.1	4	110.198	Cell cycle control protein
MLOC_65155.1	4	110.198	Leucine-rich receptor-like protein kinase family protein LENGTH=1173
MLOC_13188.2	4	110.198	Membrane protein insertase YidC 2
MLOC_65156.2	4	110.198	Pentatricopeptide repeat-containing protein, putative
MLOC_53267.2	4	110.198	Periplasmic binding protein
MLOC_18098.1	4	110.198	Receptor-kinase, putative
MLOC_18292.1	4	110.198	Remorin family protein LENGTH=486
MLOC_60639.1	4	110.446	Ataxin-10
MLOC_50290.1	4	110.446	Cyclin dependent kinase A
MLOC_37087.1	4	110.446	glucan synthase-like 10 LENGTH=1890
MLOC_53568.1	4	110.446	Hydroxymethylglutaryl-CoA synthase, putative, expressed
AK355828	4	110.446	O-methyltransferase
MLOC_60640.1	4	110.446	Oxidoreductase, 2OG-Fe(II) oxygenase family family
MLOC_50291.1	4	110.446	Post-GPI attachment to proteins factor
MLOC_68648.2	4	111.225	Unknown protein
AK358799	4	111.331	26S proteasome non-ATPase regulatory subunit 11
AK360929	4	111.331	Aspartate--tRNA ligase-like protein
MLOC_64528.1	4	111.331	Chaperone protein clpB
MLOC_73329.1	4	111.331	Charged multivesicular body protein 3
AK365216	4	111.331	Disease resistance-responsive (dirigent-like protein) family protein LENGTH=193
MLOC_64534.1	4	111.331	DNA repair protein
MLOC_59840.1	4	111.331	Ectonucleoside triphosphate diphosphohydrolase 5
MLOC_80133.4	4	111.331	FAR1-related sequence 6 LENGTH=703
MLOC_59888.1	4	111.331	F-box family protein, putative, expressed
MLOC_55415.5	4	111.331	Fructosamine kinase family protein
AK367749	4	111.331	Germin-like protein 4d
MLOC_55416.1	4	111.331	Pentatricopeptide repeat-containing protein
MLOC_64533.1	4	111.331	peptidyl-prolyl cis-trans isomerases LENGTH=343
AK363167	4	111.331	Peroxisomal membrane protein 11-1
MLOC_60423.2	4	111.331	Plant protein of unknown function (DUF863) LENGTH=483
MLOC_36901.3	4	111.331	Protein phosphatase 2c, putative
MLOC_36900.2	4	111.331	RING finger and WD repeat domain-containing protein
MLOC_55097.3	4	111.331	RING finger and WD repeat domain-containing protein
AK356496	4	111.331	Xyloglucan endotransglucosylase/hydrolase protein 5
MLOC_66801.1	4	111.948	Bifunctional inhibitor/lipid-transfer protein/seed storage 2S albumin superfamily protein LENGTH=134
MLOC_58176.2	4	111.948	Protein kinase superfamily protein LENGTH=824
AK252710.1	4	112.119	Cell number regulator 6
MLOC_53551.1	4	112.119	Chromodomain-helicase-DNA-binding protein 1-like
MLOC_29110.1	4	112.119	Coatomer alpha subunit
MLOC_66457.1	4	112.119	General transcription factor IIH subunit
MLOC_17751.1	4	112.119	Leucine-rich repeat receptor-like protein kinase
AK249011.1	4	112.119	Oxidoreductase, zinc-binding dehydrogenase family protein, expressed
MLOC_72732.3	4	112.119	Palmitoyl protein thioesterase containing protein, expressed
MLOC_66975.3	4	112.119	Sugar transporter, putative
MLOC_49761.1	4	112.174	Uncharacterised protein family (UPF0497) LENGTH=152
MLOC_64782.2	4	112.327	Beta-fructofuranosidase
MLOC_7084.3	4	112.327	Dual protein phosphatase 4
MLOC_70063.2	4	112.327	GHMP kinase protein
AK354381	4	112.327	Hydrolase, alpha/beta fold family protein, expressed
MLOC_37252.1	4	112.327	Pentatricopeptide repeat-containing protein, putative
AK365896	4	112.327	Unknown protein
AK361453	4	112.327	WD-repeat protein, putative
AK374366	4	112.331	Bifunctional inhibitor/lipid-transfer protein/seed storage 2S albumin superfamily protein LENGTH=149
AK360661	4	112.535	ATP-dependent Clp protease proteolytic subunit
AK251931.1	4	112.535	Branched-chain-amino-acid aminotransferase
MLOC_58890.1	4	112.535	BTB/POZ domain containing protein
MLOC_70762.1	4	112.535	FAD-binding Berberine family protein LENGTH=535
MLOC_18417.1	4	112.535	Fatty acyl coA reductase
MLOC_58892.3	4	112.535	Myosin heavy chain-related protein LENGTH=853
MLOC_58889.1	4	112.535	NBS-LRR disease resistance protein
MLOC_5021.1	4	112.535	Respiratory burst oxidase-like protein B2
AK373965	4	112.96	Phosphatidylinositol N-acetyglucosaminlytransferase subunit P-like protein
MLOC_15230.1	4	113.137	2-dehydro-3-deoxyphosphogluconate aldolase/4-hydroxy-2-oxoglutarate aldolase
MLOC_10539.3	4	113.137	ABC(ATP-binding) family transporter
AK375220	4	113.137	Expansin B4
MLOC_45717.1	4	113.137	Pollen allergen-like protein
MLOC_79748.3	4	113.137	Retinol dehydrogenase 12
AK365879	4	113.27	Xyloglucan endotransglucosylase/hydrolase protein 32
MLOC_33809.1	4	113.739	60 kDa jasmonate-induced protein
AK372562	4	113.739	60 kDa jasmonate-induced protein, putative
AK251203.1	4	113.739	Acid phosphatase
AK364105	4	113.739	Armadillo/beta-catenin-like repeat family protein
MLOC_10843.1	4	113.739	Bifunctional inhibitor/lipid-transfer protein/seed storage 2S albumin superfamily protein LENGTH=168
MLOC_16300.1	4	113.739	Ectonucleoside triphosphate diphosphohydrolase 5
AK376221	4	113.739	Expansin protein
MLOC_22160.1	4	113.739	HXXXD-type acyl-transferase family protein LENGTH=428
MLOC_71487.4	4	113.739	PAIR1 protein, putative, expressed
AK369262	4	113.739	Phosphatidylinositol-4-phosphate 5-kinase family protein, putative, expressed
AK368847	4	113.739	Protein of unknown function (DUF3527) LENGTH=694
MLOC_60426.3	4	113.739	RNA polymerase II transcription mediators LENGTH=2253
MLOC_24239.1	4	113.739	Transferase family protein, expressed
MLOC_10437.1	4	113.739	tRNA/rRNA methyltransferase (SpoU) family protein
MLOC_51915.2	4	113.739	Ubiquitin-protein ligase, putative
MLOC_48416.1	4	113.739	Unknown protein
MLOC_60425.1	4	113.739	UPF0187-containing protein
MLOC_7409.1	4	113.811	Small nuclear ribonucleoprotein-like protein
AK365195	4	114.943	basic helix-loop-helix (bHLH) DNA-binding superfamily protein LENGTH=264
AK248746.1	4	115.227	basic helix-loop-helix (bHLH) DNA-binding superfamily protein LENGTH=181
AK251005.1	4	115.227	Tubulin beta chain, putative
